# Supplementary material for: Efficient photocatalytic conversion of xylose to co-produce xylonic acid and CO via a dual S-scheme heterojunction photocatalyst between carbon nitride and CuInS2 quantum dot-sensitized ZnIn2S4
Source: Royal Society of Chemistry journal article supplement (doi:10.1039/d3gc03990k), 2024-01-01
Supplement: d3gc03990k1.pdf [file d3gc03990k1.pdf]

## Electronic Supplementary Information

### **Efficient photocatalytic conversion of xylose to co-produce xylonic acid and CO via dual S-scheme heterojunction photocatalyst between carbon nitride and CuInS<sub>2</sub> quantum dots sensitized ZnIn<sub>2</sub>S<sub>4</sub>**

Kangning Liu,<sup>‡</sup> Junqiang Zhang,<sup>‡</sup> Jiliang Ma\* and Runcang Sun\*

Liaoning Key Lab of Lignocellulose Chemistry and BioMaterials, Liaoning Collaborative Innovation Center for Lignocellulosic Biorefinery, College of Light Industry and Chemical Engineering, Dalian Polytechnic University, Dalian 116034, China

\*Corresponding authors' E-mail address: jlma@dlpu.edu.cn (Jiliang Ma) and rcsun3@dlpu.edu.cn (Runcang Sun), Tel.: +86-0411-86323652, Fax: +86-0411-86323652

## Abbreviations

High performance liquid chromatography (HPLC); Scanning electron microscopy (SEM); Transmission electron microscopy (TEM); Energy dispersive spectroscopy (EDS); Energy dispersive X-ray spectroscopy (EDX); High-resolution transmission electron microscopy (HR-TEM); Selected area electron diffraction (SAED); X-ray diffraction (XRD); X-ray photoelectron spectroscopy (XPS); Ultraviolet-visible diffusion reflectance spectroscopy (UV-vis DRS); Valence band (VB); Conduction band (CB); Flat band potential ( $E_{fb}$ ); Normal hydrogen electrode (NHE); Ultraviolet photoelectron spectroscopy (UPS); Electrochemical impedance spectroscopy (EIS); Electron spin resonance (ESR); 2,2,6,6-tetramethylpiperidine-N-oxyl (TEMPO); 5,5-dimethyl-1-pyrroline N-oxide (DMPO); 2,2,6,6-tetramethyl-4-piperidone-1-oxyl (TEMPONE).

## Characterization

TEM were recorded on JEM-2100 CXII and SEM were explored on Hitachi-4800. The powder XRD patterns were measured with a Bruker D8 Focus diffractometer (CuK $\alpha$  radiation,  $\lambda = 0.15418$  nm) in the  $\theta$ - $2\theta$  mode. XPS analysis was performed with a Kratos Axis Ultra DLD spectrometer employing a monochromated AlK $\alpha$  X-ray source (1486.6 eV). UV-vis DRS was achieved on a Hitachi U3900 spectrophotometer by using BaSO $_4$  as the reference. PL spectrum was measured by an Edinburgh FLS-920 spectrometer. Time-resolved photoluminescence (TRPL) spectra were acquired using

a FLE1000 fluorescence lifetime spectrophotometer (Edinburgh Instruments, U.K.) at an excitation wavelength of 375 nm. Electron spin-resonance spectroscopy was used to study molecules and materials with unpaired electrons, and DMPO was chosen as a spin trap for the detection of hydroxyl radical ( $\cdot\text{OH}$ ) and superoxide ( $\cdot\text{O}_2^-$ ), TEMPO was applied to characterize electrons and holes, while TEMPONE was used to detect singlet oxygen. UPS was measured by using a He (21.20 eV) as monochromatic discharge light source and a VG Scienta R4000 analyzer. A sample bias of -5 V was applied to observe the secondary electron cut-off (SECO).

## **Photoelectrochemical measurements**

Electrochemical measurements were carried out on a CHI760E electrochemical workstation with a standard three-electrodes system. Among them, a Pt wire was used as the counter electrode, and the reference electrode was the saturated Ag/AgCl. The cleaned F-doped tin oxide glass was used as the working electrode. Typically, 5 mg of corresponding photocatalyst and 20  $\mu\text{L}$  of Nafion (5%) were added into 980  $\mu\text{L}$  of ethanol to form a homogeneous slurry. The homogeneous slurry was ultrasonicated for 30 min and then coated on the FTO glass (area 1 cm  $\times$  1 cm). The obtained system was dried at 150  $^\circ\text{C}$  for 60 min. The supporting electrolyte was  $\text{Na}_2\text{SO}_4$  solution (0.5 M) with the pH value of 6.8. The incident visible light source was Xe lamp (300 W). The photocurrent-time was investigated in the irradiation of Xe lamp at a bias potential of 0.5 V vs. Ag/AgCl. Electrochemical impedance spectroscopy (EIS) was detected by an AC voltage amplitude of 10 mV at -0.3 V versus Ag/AgCl over the frequency range

from 100,000 Hz to 1 Hz. The Mott-Schottky was studied in the electrolyte of Na<sub>2</sub>SO<sub>4</sub> (0.5 M), and the frequency of the AC potential was set as 500, 800, and 1000 Hz, respectively, as well as the amplitude was 10 mV.

## Products analysis

CO was analyzed by gas chromatography (GC-7900, Ar carrier gas, molecular sieve 5 Å column, external event) equipped with a flame ionization detector (FID). Sampler temperature was 110 °C. Column temperature was 60 °C. Detector temperature was 200 °C.

After the reaction, the samples were filtrated with a Millipore filter (0.22 µm) and analyzed by HPLC with a Bio-Rad Aminex HPX-87H column (300 mm × 7.8 mm × 9 µm). Concentrations of lactic acid was measured by Waters 2414 RI detector. The mobile phase was 5 mmol H<sub>2</sub>SO<sub>4</sub> at a flow rate of 0.5 mL/min. The temperature of column was set at 55 °C and the total time to finish the product analysis was set at 30 min.

$$\text{Conversion (\%)} = \frac{\text{Moles of carbon in feedstock consumed}}{\text{Moles of carbon in feedstock input}} \times 100\%$$

$$\text{Product yield (\%)} = \frac{\text{Moles of carbon in organic acid}}{\text{Moles of carbon in feedstock input}} \times 100\%$$

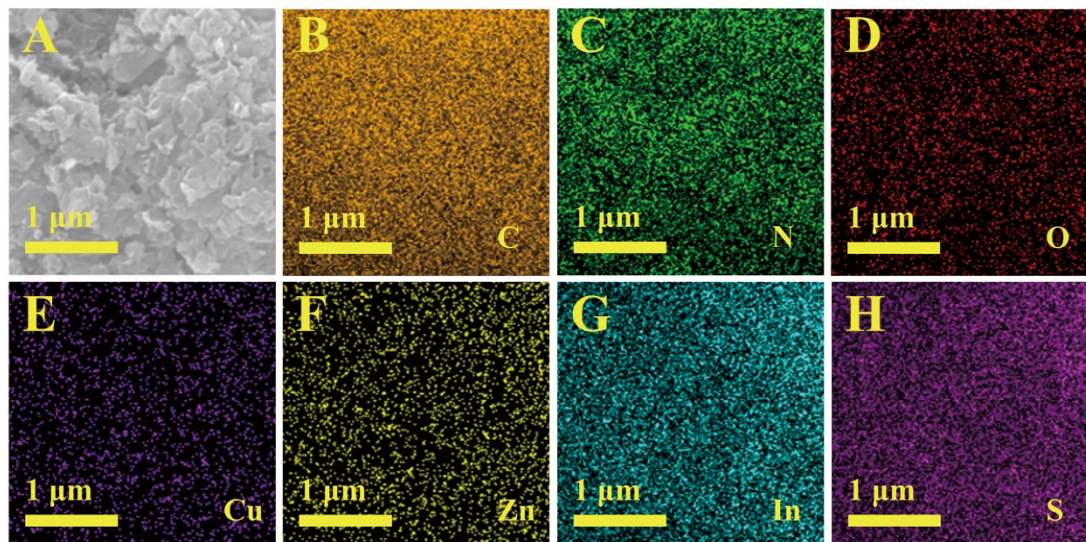

**Fig. S1** SEM image (A) and corresponding EDS mappings of C-*s*-ZIS/CN: C (B); N (C); O (D); Cu (E); Zn (F); In (G) and S (H).

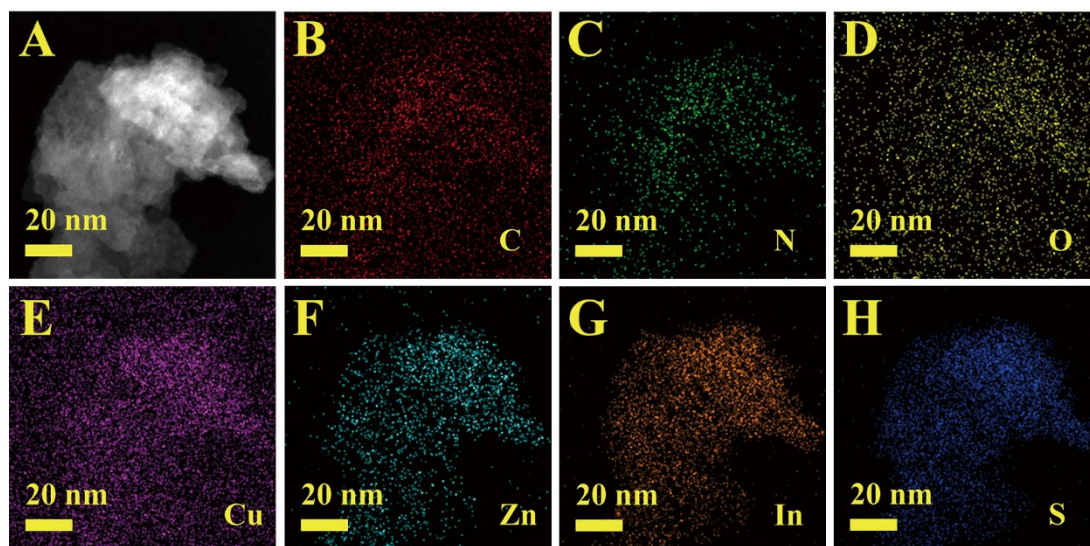

**Fig. S2** TEM image (A) and corresponding EDX mappings of C-*s*-ZIS/CN: C (B); N (C); O (D); Cu (E); Zn (F); In (G) and S (H).

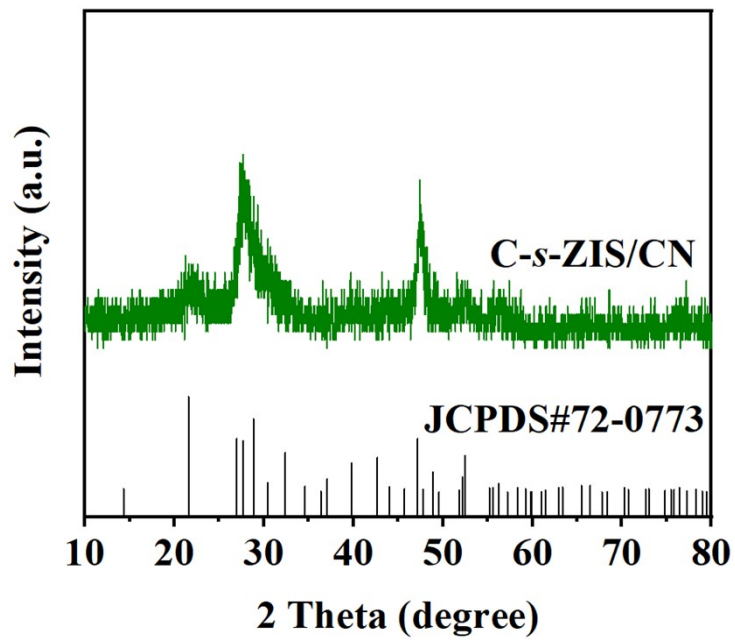

**Fig. S3** XRD pattern of C-s-ZIS/CN.

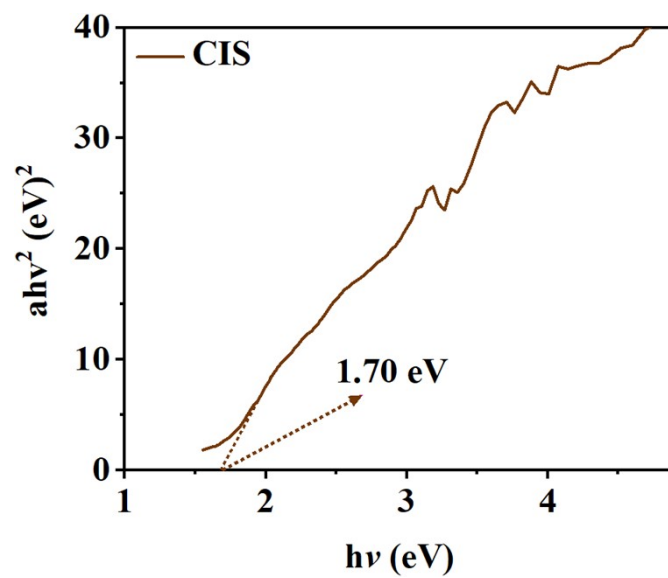

Fig. S4 Tauc plot of CIS.



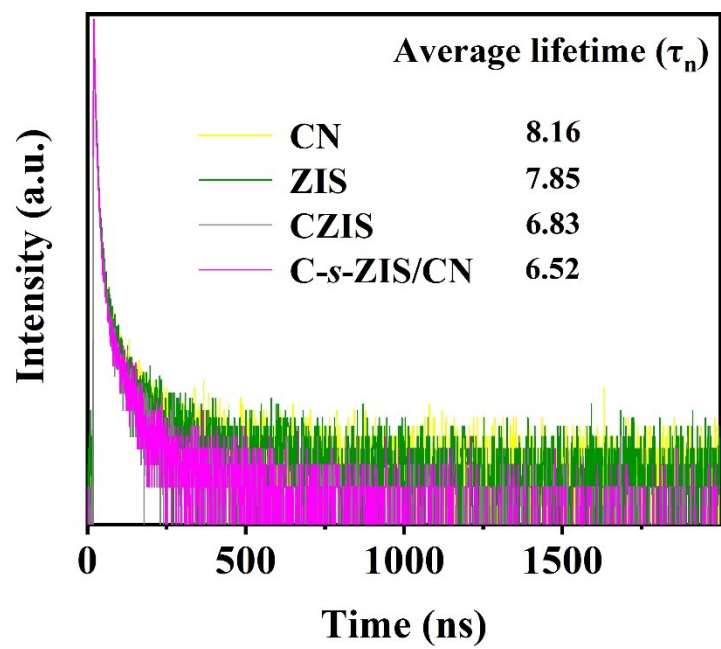

Fig. S5 TRPL spectra of prepared photocatalysts.

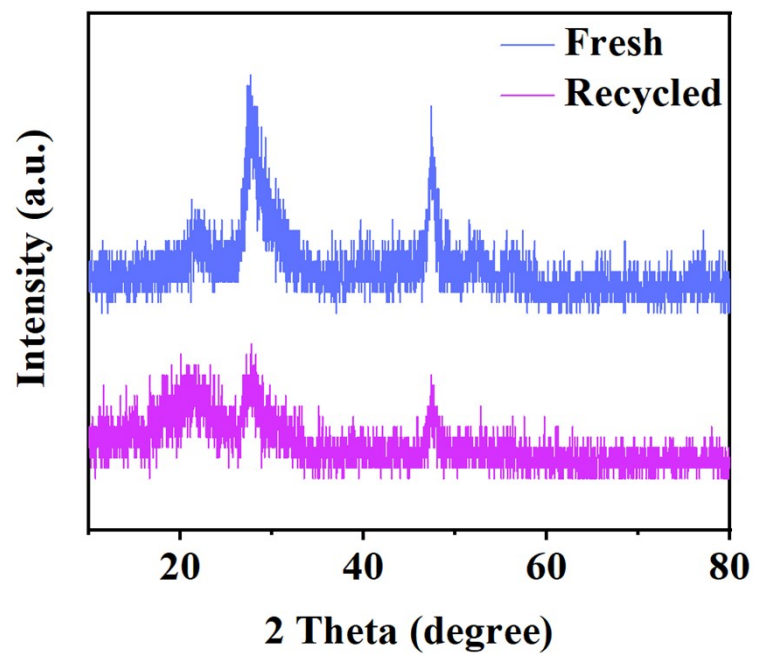

Fig. S6 XRD patterns of fresh and recycled C-*s*-ZIS/CN.
